# Supplementary material
Source: PubMed Central journal article supplement (PMC3529011)
Supplement: 1207943110_pnas.201207943SI.pdf [file 1207943110_pnas.201207943SI.pdf]

# Supporting Information

Weller et al. 10.1073/pnas.1207943110

## SI Methods

**Plant Material.** Representative lines from the *Pisum* germplasm collection at the John Innes Centre (1), and the Chinese national core collection (2) were selected on the basis of published diversity data (1, 2) and obtained through the Australian Temperate Field Crops Collection (Department of Primary Industry, Horsham, VIC, Australia). Details of accessions are included in Table S1. The reference line NGB5839 is an isogenic dwarf derivative of cv. Torsdag that carries a mutation in the gibberellin biosynthesis gene *LE*, and has been extensively used in mutagenesis programs (e.g., refs. 3 and 4). Line JI1794 is a representative accession of the northern race of *Pisum sativum* var. *humile* suggested by Ben Ze'ev and Zohary (5) to be the major wild contributor to the domesticated pea gene pool. Dominant alleles at the *HIGH RESPONSE TO PHOTOPERIOD* (*HR*) locus were introgressed into the NGB5839 genetic background from the line Wellensiek's Dominant [Hobart line HL16, John Innes line JI1228, Weibullsholm line WL1771 (6)] through six successive backcrosses, by phenotypic selection for delayed flowering under short day (SD). A small set of diverse lentil lines from the collection at the International Center for Agricultural Research in the Dry Areas was provided by W. Erskine (International Center for Agricultural Research in the Dry Areas, Aleppo, Syria) and genetic control of flowering was examined in crosses between cv. Northfield (ILL5588) and ILL6005, an early-flowering derivative of a cross between cv. Precoz (ILL4605) and cv. Laird (ILL4349).

**Plant Growth Conditions and Measurements.** Plants were grown in a 1:1 mixture of dolerite chips and vermiculite topped with potting mix, and received nutrient solution weekly. Plants for expression experiments in Fig. 2 were grown in growth cabinets at 20 °C under 150  $\mu\text{mol}\cdot\text{m}^{-2}\cdot\text{s}^{-1}$  light from cool-white fluorescent tubes. Segregating progenies and plants for photoperiod response experiments were grown in the phytotron in the School of Plant Science at the University of Tasmania and received an 8-h photoperiod of natural daylight either with (long day, LD) or without (SD) an 8-h extension of 10  $\mu\text{mol}\cdot\text{m}^{-2}\cdot\text{s}^{-1}$  white light from cool-white compact fluorescent tubes [LDH; red (R):far red (FR) = 4.8], 40 W incandescent globes (LDL; R:FR = 0.6) or a combination of both of these light sources (LD; R:FR = 1.2). Flowering was quantified as the node of flower initiation, and the propensity to branch was expressed as branching index (Figs. 1C and 2A), calculated as the ratio of the increase in length of newly-released lateral branches to the increase in total plant height over a specified interval.

**Mapping and Quantitative Trait Loci Analysis.** The genetic control of domestication-related changes in SD flowering was addressed in a population of 92  $F_2$  individuals from a cross between NGB5839 and JI1794. Morphological and gene-based molecular markers were scored following details given in Table S5. Molecular markers were developed from sequences previously mapped in crosses within domesticated pea (7) or from genes in syntenic regions of the *Medicago truncatula* genome, and targeted to non-coding sequences where possible. Genomic DNA was extracted using a CTAB method as previously described (8) and high-resolution melt (HRM) markers were scored using the Type-it HRM PCR kit (Qiagen) in a Rotor-Gene Q (Qiagen) according to the manufacturer's instructions. Genetic maps were constructed

using JoinMap 4, and quantitative trait loci (QTL) were detected using both interval mapping and multiple QTL mapping (MQM) in MapQTL (Kyazma) (9, 10). Interval mapping was first performed, using default parameters of MapQTL6. The LOD threshold for chromosome-wide significance was determined by permutation testing (10,000 replications) and was in the range 2.7–2.9. Map intervals exceeding the significance threshold were individually selected as cofactors for MQM analysis. Individual and joint contributions of *QTL3*, *QTL6*, and other loci to flowering and other traits were variously estimated by the Kruskal–Wallis single marker test in MapQTL6 and by generalized linear model and two-way ANOVA in SAS from genotypes of peak markers. Contributions of known flowering loci were assessed similarly using markers for the genes themselves (*LF*, *GIGAS*) or closely linked markers (*SN*) (Table S3).

**Gene Isolation, Expression Analysis, and Complementation.** The full-length *ELF3* gene and cDNA were isolated using PCR techniques, genome walking (GenomeWalker universal kit; Clontech), and rapid amplification of cDNA ends (SMART RACE cDNA amplification kit; Clontech) using specific primers designed on an initial DNA fragment obtained with degenerate primers (11). Harvested tissue for expression experiments consisted of both leaflets from the uppermost fully expanded leaf. RNA extraction, reverse transcription, and real-time PCR analysis were performed as described previously (8).

Full-length cDNA fragments for *PsELF3* genes differing only for the putative causal polymorphism were generated by PCR from pea lines NGB5839 and WL1771 using primers listed in Table S6. The cDNA fragments were first cloned in pCR8/GW/TOPO (Invitrogen) then recombined into the binary vector pB2GW7 using Gateway cloning (12), and confirmed by sequencing. The *Arabidopsis elf3-1* mutant in the ecotype Columbia background has been previously described and carries a nonsense mutation in exon 3 (13). Transformation of the *Arabidopsis elf3-1* mutant was conducted by floral dipping (14) and the flowering phenotypes of several independent transformants per construct were characterized through several generations under both LD and SD conditions.

**Eco-Targeting Induced Local Lesions in Genomes and Sequence Analysis.** Details of all primer sequences are given in Table S6. The pea *ELF3* genomic sequence spanning the complete coding region was amplified in two overlapping fragments using primer pairs PsELF3-FF/PsELF3-11R and PsELF3-5F/PsELF3-RR. Genomic and cDNA sequences covering the entire coding region of the lentil *ELF3* gene were similarly isolated using a combination of pea- and lentil-specific primers (Table S6). PCR fragments were sequenced at Macrogen (<http://dna.macrogen.com/eng>). All sequences were then individually edited and aligned using Sequencher 5.0 (Gene Codes Corporation), with manual refinement. Distance and parsimony-based methods were used for phylogenetic analyses in PAUP\*4.0b10 (<http://paup.csit.fsu.edu>) using the dataset presented in Fig. S2. Eco-Targeting Induced Local Lesions in Genomes (TILLING) was conducted on the *Pisum* germplasm collection maintained at the Centre des Ressources Biologiques (CRB) (15). Because of limitations on amplicon size, analysis was conducted on two amplicons spanning most of the coding sequence but omitting the large intron 2 (Fig. 3).

1. Jing R, et al. (2010) The genetic diversity and evolution of field pea (*Pisum*) studied by high throughput retrotransposon based insertion polymorphism (RBIP) marker analysis. *BMC Evol Biol* 10:44.
2. Zong X, et al. (2009) Analysis of a diverse global *Pisum* sp. collection and comparison to a Chinese local *P. sativum* collection with microsatellite markers. *Theor Appl Genet* 118(2):193–204.
3. Hecht V, et al. (2007) Pea *LATE BLOOMER1* is a *GIGANTEA* ortholog with roles in photoperiodic flowering, deetiolation, and transcriptional regulation of circadian clock gene homologs. *Plant Physiol* 144(2):648–661.
4. Hecht V, et al. (2011) The pea *GIGAS* gene is a *FLOWERING LOCUS T* homolog necessary for graft-transmissible specification of flowering but not for responsiveness to photoperiod. *Plant Cell* 23(1):147–161.
5. Ben-Ze'ev N, Zohary D (1973) Species relationships in the genus *Pisum* L. *Isr J Plant Sci* 22:73–91.
6. Murfet IC (1971) Flowering in *Pisum*. Three distinct phenotypic classes determined by the interaction of a dominant early and a dominant late gene. *Heredity* 26:243–257.
7. Bordat A, et al. (2011) Translational genomics in legumes allowed placing in silico 5460 unigenes on the pea functional map and identified candidate genes in *Pisum sativum* L. *G3 (Bethesda)* 1(4):93–103.
8. Liew LC, et al. (2009) *DIE NEUTRALIS* and *LATE BLOOMER 1* contribute to regulation of the pea circadian clock. *Plant Cell* 21(10):3198–3211.
9. Van Ooijen JW (2006) *JoinMap 4* (Kyazma, Wageningen, Netherlands).
10. Van Ooijen JW (2009) *MapQTL 6* (Kyazma, Wageningen, Netherlands).
11. Hecht V, et al. (2005) Conservation of *Arabidopsis* flowering genes in model legumes. *Plant Physiol* 137(4):1420–1434.
12. Karimi M, Inzé D, Depicker A (2002) GATEWAY vectors for *Agrobacterium*-mediated plant transformation. *Trends Plant Sci* 7(5):193–195.
13. Hicks KA, Albertson TM, Wagner DR (2001) *EARLY FLOWERING3* encodes a novel protein that regulates circadian clock function and flowering in *Arabidopsis*. *Plant Cell* 13(6):1281–1292.
14. Bechtold N, Ellis J, Pelletier G (1993) In planta *Agrobacterium* mediated gene transfer by infiltration of adult *Arabidopsis thaliana* plants. *CR Acad Sci Paris.Sciences de la Vie* 316(10):1194–1199.
15. Deulvot C, et al. (2010) Highly-multiplexed SNP genotyping for genetic mapping and germplasm diversity studies in pea. *BMC Genomics* 11:468.

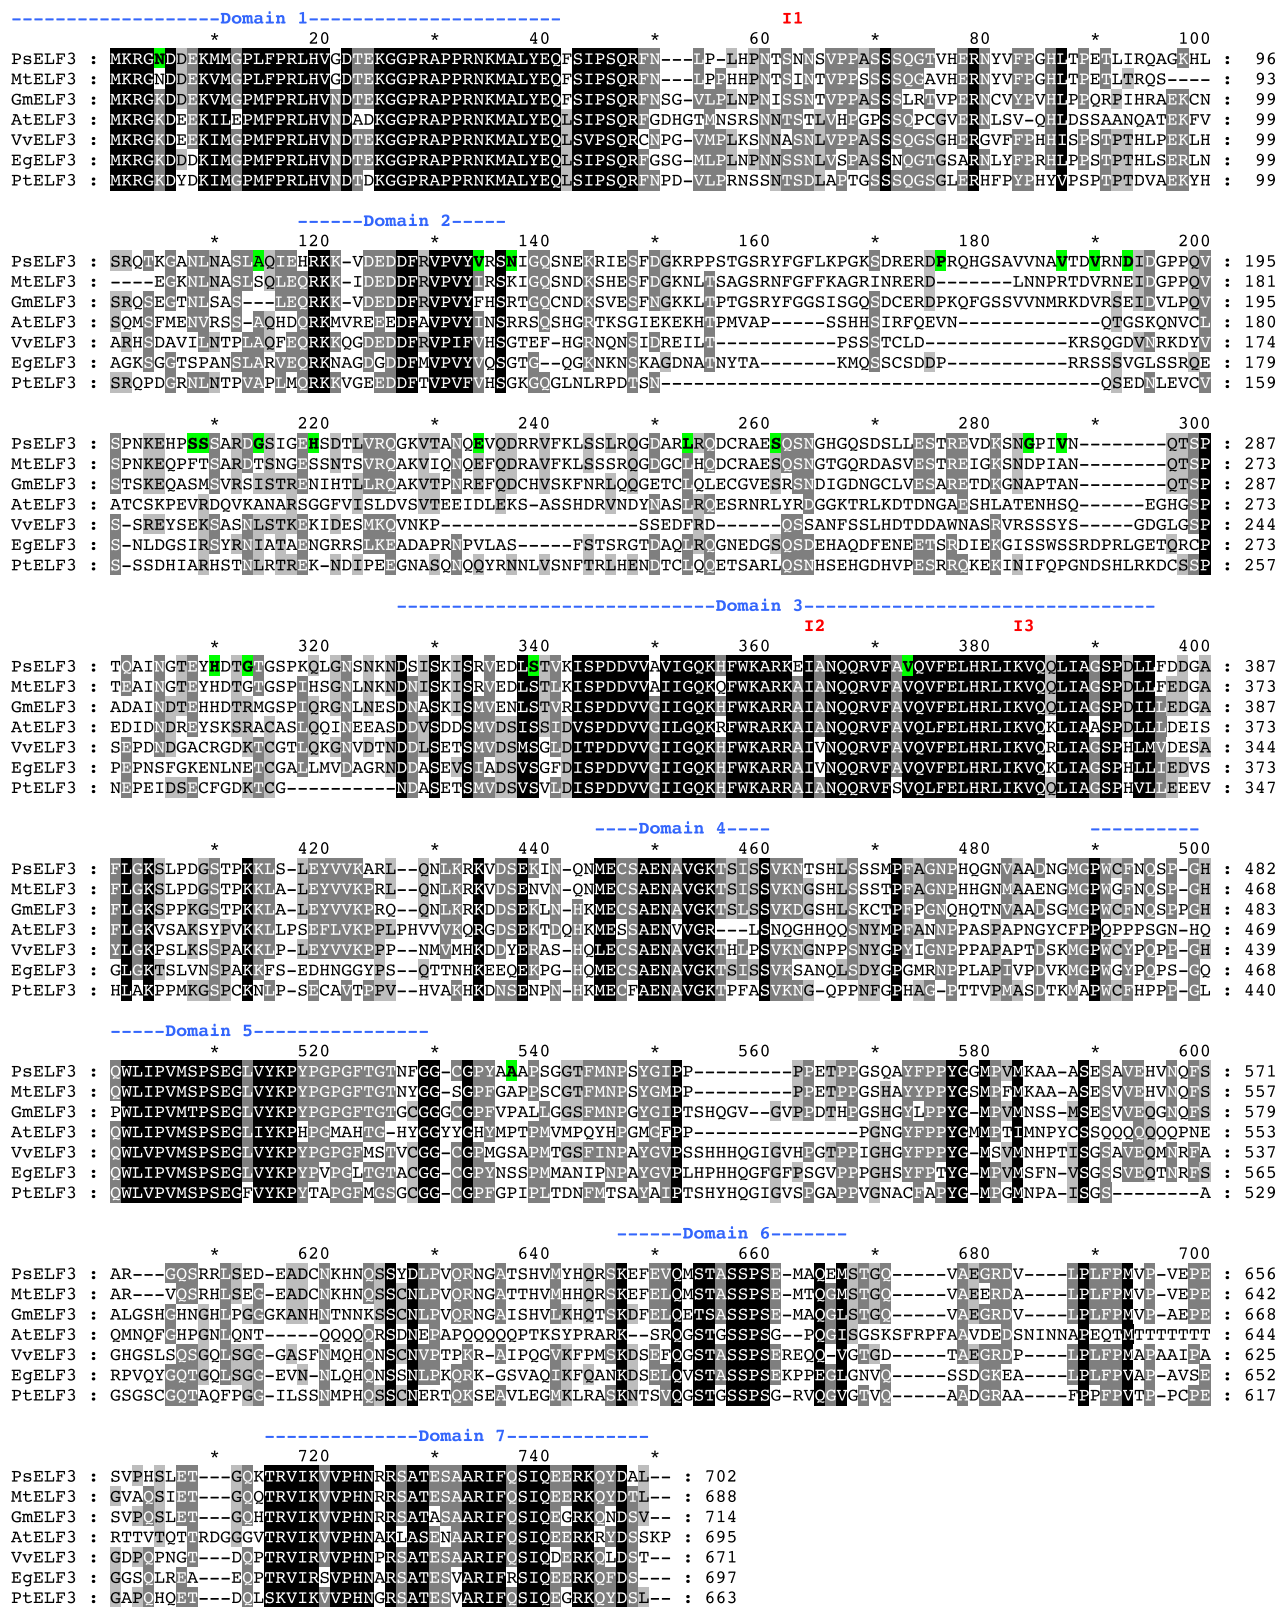

Fig. S1. ELF3 protein alignment. Intron positions are marked in red as I1 (intron 1), I2 (intron 2) and I3 (intron 3). Conserved domains represented in Fig. 3A are indicated in blue. Amino acid substitutions identified in the diversity survey (Fig. S2) are highlighted in green. *Pisum sativum*, PsELF3 (JN983406, haplotype B in Fig. S2); *Medicago truncatula*, MtELF3 (Medtr3g140450); *Glycine max*, GmELF3 (Glyma04g05280); *Arabidopsis thaliana*, AtELF3 (At2g25930); *Vitis vinifera*, VvELF3 (CB120609); *Eucalyptus grandis*, EgELF3 (Egrandis\_v1\_0.004619m); *Populus trichocarpa*, PtELF3 (EEE93045).



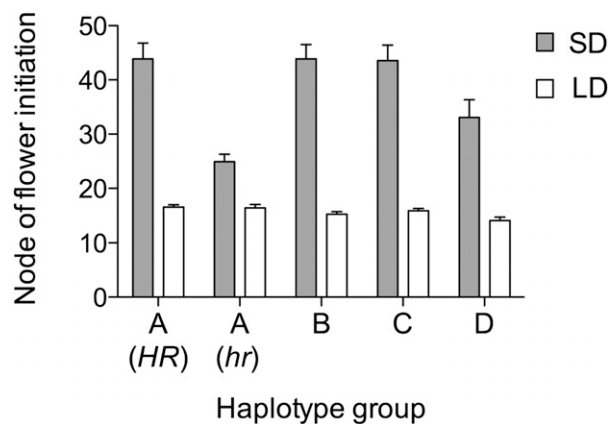

**Fig. S3.** Effect of *ELF3* haplotype on flowering response to photoperiod. Accessions shown in Fig. 1A were grouped according to the major *ELF3* haplotype groups shown in Fig. 4. Data represent means  $\pm$  SE for  $n = 7$  (A-HR), 18 (A-hr), 14 (B), 19 (C), and 5 (D) of individual accession data represented in Fig. 1A.

**Table S1. Details of *Pisum* accessions**

| Accession ID | Alternative accession ID | Haplo-type group | Haplo-type | Jing et al. (1) group | Species           | Variety        | Country of origin | GTY | PL | M | FS |
|--------------|--------------------------|------------------|------------|-----------------------|-------------------|----------------|-------------------|-----|----|---|----|
| WL1771       | JI 1228                  | A                | 1          |                       | <i>P. sativum</i> | <i>sativum</i> | Sweden            | gty | PL | M | FS |
| JI 100       | ATC 2704                 | A                | 1          | 3.3                   | <i>P. sativum</i> | <i>sativum</i> | Afghanistan       | gty | PL | m | FS |
| JI 157       | ATC 103                  | A                | 1          | 3.5                   | <i>P. sativum</i> | <i>sativum</i> | Sudan             | GTY | pl | M | fs |
| JI 189       | ATC 1192                 | A                | 1          | 3.5                   | <i>P. sativum</i> | <i>sativum</i> | Sudan             | gty | PL | m | fs |
| JI 281       |                          | A                | 1          |                       | <i>P. sativum</i> | <i>sativum</i> | Ethiopia          | GTY | pl | m | fs |
| JI 290       | ATC 1474                 | A                | 1          | 3.5                   | <i>P. sativum</i> | <i>sativum</i> | Ethiopia          | gty | PL | m | FS |
| JI 1497      | ATC 3459                 | A                | 1          | 3.4                   | <i>P. sativum</i> | <i>sativum</i> | Mongolia          | gty | PL | m | FS |
| JI 2077      | ATC 1662                 | A                | 1          | 3.1                   | <i>P. sativum</i> | <i>sativum</i> | Sudan             | gty | pl | M | FS |
| JI 2289      | Champagne                | A                | 1          |                       | <i>P. sativum</i> | <i>sativum</i> | —                 | gty | PL | M | FS |
| CRB 056      | Assas                    | A                | 1          |                       | <i>P. sativum</i> | <i>sativum</i> | France            |     |    |   |    |
| CRB 062      | Blixt 484                | A                | 1          |                       | <i>P. sativum</i> | <i>sativum</i> | Sweden            |     |    |   |    |
| CRB 096      | Holly 7                  | A                | 1          |                       | <i>P. sativum</i> | <i>sativum</i> | —                 |     |    |   |    |
| CRB 122      | PI269763                 | A                | 1          |                       | <i>P. sativum</i> | <i>sativum</i> | England           |     |    |   |    |
| CRB 128      | PI180693                 | A                | 1          |                       | <i>P. sativum</i> | <i>sativum</i> | Germany           |     |    |   |    |
| CRB 186      | Rosakrone                | A                | 1          |                       | <i>P. sativum</i> | <i>sativum</i> | Germany           |     |    |   |    |
| CRB 390      | DP                       | A                | 1          |                       | <i>P. sativum</i> | <i>sativum</i> | —                 |     |    |   |    |
| CRB 395      | JI 1184                  | A                | 1          |                       | <i>P. sativum</i> | <i>sativum</i> | Latvia            |     |    |   |    |
| CRB 435      | Glacier                  | A                | 1          |                       | <i>P. sativum</i> | <i>sativum</i> | USA               |     |    |   |    |
| TOR le.3     | NGB 5839                 | A                | 2          |                       | <i>P. sativum</i> | <i>sativum</i> | Sweden            | gty | pl | m | fs |
| JI 182       | ATC 1405                 | A                | 2          | 3.5                   | <i>P. sativum</i> | <i>sativum</i> | Nepal             | gty | pl | m | -  |
| JI 399       | Cennia                   | A                | 2          |                       | <i>P. sativum</i> | <i>sativum</i> | Germany           | gty | pl | m | -  |
| JI 1214      | ATC 2925                 | A                | 2          | 3.1                   | <i>P. sativum</i> | <i>sativum</i> | —                 | gty | pl | m | -  |
| JI 1268      | ATC 1534                 | A                | 2          | 3.0                   | <i>P. sativum</i> | <i>sativum</i> | India             | gty | pl | M | FS |
| JI 1547      | ATC 1564                 | A                | 2          | 3.5                   | <i>P. sativum</i> | <i>sativum</i> | Afghanistan       | gty | pl | m | FS |
| JI 1756      | ATC 1624                 | A                | 2          | 3.5                   | <i>P. sativum</i> | <i>sativum</i> | Nepal             | gty | pl | m | -  |
| JI 1792      | ATC 1629                 | A                | 2          | 3.5                   | <i>P. sativum</i> | <i>sativum</i> | Nepal             | gty | pl | m | -  |
| JI 1877      | ATC 1652                 | A                | 2          | 3.1                   | <i>P. sativum</i> | <i>sativum</i> | Ethiopia          | gty | pl | m | FS |
| JI 3108      | Térèse                   | A                | 2          |                       | <i>P. sativum</i> | <i>sativum</i> | France            | gty | pl | m | fs |
| JI 1577      | ATC 3807                 | A                | 2          | 2.1                   | <i>P. sativum</i> | <i>sativum</i> | China             | gty | pl | m | fs |
| ATC 7009     | GD2                      | A                | 2          |                       | <i>P. sativum</i> | <i>sativum</i> | China             | gty | pl | m | FS |
| ATC 7030     | SC2                      | A                | 2          |                       | <i>P. sativum</i> | <i>sativum</i> | China             | gty | PL | m | FS |
| ATC 7032     | YN1                      | A                | 2          |                       | <i>P. sativum</i> | <i>sativum</i> | China             | gty | pl | m | FS |
| ATC 7044     | SX1                      | A                | 2          |                       | <i>P. sativum</i> | <i>sativum</i> | China             | gty | PL | m | FS |
| ATC 7056     | SX2                      | A                | 2          |                       | <i>P. sativum</i> | <i>sativum</i> | China             | gty | PL | m | FS |
| ATC 7094     | TB2                      | A                | 2          |                       | <i>P. sativum</i> | <i>sativum</i> | China             | gty | pl | m | FS |
| ATC 7097     | XJ2                      | A                | 2          |                       | <i>P. sativum</i> | <i>sativum</i> | China             | gty | PL | m | FS |
| ATC 7139     | AH1                      | A                | 2          |                       | <i>P. sativum</i> | <i>sativum</i> | China             | gty | pl | m | FS |
| ATC 7156     | GZ1                      | A                | 2          |                       | <i>P. sativum</i> | <i>sativum</i> | China             | gty | PL | M | FS |
| ATC 7157     | GZ2                      | A                | 2          |                       | <i>P. sativum</i> | <i>sativum</i> | China             | gty | PL | m | FS |
| ATC 7168     | IM4                      | A                | 2          |                       | <i>P. sativum</i> | <i>sativum</i> | China             | gty | PL | m | FS |
| ATC 7177     | GX2                      | A                | 2          |                       | <i>P. sativum</i> | <i>sativum</i> | China             | gty | pl | m | FS |

Table S1. Cont.

| Accession ID | Alternative accession ID | Haplo-type group | Haplo-type | Jing et al. (1) group | Species           | Variety            | Country of origin | GTY | PL | M | FS |
|--------------|--------------------------|------------------|------------|-----------------------|-------------------|--------------------|-------------------|-----|----|---|----|
| CRB 006      | Dove                     | A                | 2          |                       | <i>P. sativum</i> | <i>sativum</i>     | France            |     |    |   |    |
| CRB 119      | 90–2079                  | A                | 2          |                       | <i>P. sativum</i> | <i>sativum</i>     | USA               |     |    |   |    |
| CRB 123      | PI271936                 | A                | 2          |                       | <i>P. sativum</i> | <i>sativum</i>     | Sweden            |     |    |   |    |
| CRB 130      | 552                      | A                | 2          |                       | <i>P. sativum</i> | <i>sativum</i>     | USA               |     |    |   |    |
| CRB 193      | Cuzco 1                  | A                | 2          |                       | <i>P. sativum</i> | <i>sativum</i>     | Peru              |     |    |   |    |
| CRB 200      | Haiti Colore             | A                | 2          |                       | <i>P. sativum</i> | <i>sativum</i>     | Haiti             |     |    |   |    |
| CRB 253      | Timo                     | A                | 2          |                       | <i>P. sativum</i> | <i>sativum</i>     | Sweden            |     |    |   |    |
| CRB 258      | Rodogune                 | A                | 2          |                       | <i>P. sativum</i> | <i>sativum</i>     | France            |     |    |   |    |
| CRB 360      | K30                      | A                | 2          |                       | <i>P. sativum</i> | <i>sativum</i>     | Russia            |     |    |   |    |
| CRB 370      | Chinois 2                | A                | 2          |                       | <i>P. sativum</i> | <i>sativum</i>     | China             |     |    |   |    |
| CRB 383      | CE101 = FP               | A                | 2          |                       | <i>P. sativum</i> | <i>sativum</i>     | France            |     |    |   |    |
| CRB 432      | Finale                   | A                | 2          |                       | <i>P. sativum</i> | <i>sativum</i>     | Holland           |     |    |   |    |
| CRB 439      | MIR12                    | A                | 2          |                       | <i>P. sativum</i> | <i>sativum</i>     | Germany           |     |    |   |    |
| CRB 448      | JI 296                   | A                | 2          |                       | <i>P. sativum</i> | <i>sativum</i>     | France            |     |    |   |    |
| CRB 324      | ZP130                    | A                | 3          |                       | <i>P. sativum</i> | <i>sativum</i>     | Spain             |     |    |   |    |
| JI 2055      |                          | —                | 4          | 3.2                   | <i>P. sativum</i> | <i>elatius</i>     | Italy             | GTY | PL | M | FS |
| JI 1096      |                          | —                | 5          | 3.2                   | <i>P. sativum</i> | <i>elatius</i>     | Greece            | GTY | PL | M | FS |
| JI 95        | ATC 2702                 | B                | 6          | 3.3                   | <i>P. sativum</i> | <i>sativum</i>     | Afghanistan       | gty | PL | M | FS |
| JI 181       | ATC 1054                 | B                | 6          | 3.4                   | <i>P. sativum</i> | <i>sativum</i>     | Nepal             | gty | pl | M | FS |
| JI 252       | ATC 2333                 | B                | 6          | 3.4                   | <i>P. sativum</i> | <i>sativum</i>     | Ethiopia          | gty | PL | M | FS |
| JI 1040      | ATC 1500                 | B                | 6          | 3.3                   | <i>P. sativum</i> | <i>sativum</i>     | Afghanistan       | gty | pl | M | FS |
| JI 1261      | ATC 1531                 | B                | 6          | 3.4                   | <i>P. sativum</i> | <i>sativum</i>     | India             | gty | pl | M | FS |
| JI 2069      | ATC 1658                 | B                | 6          | 3.4                   | <i>P. sativum</i> | <i>sativum</i>     | Nepal             | gty | pl | M | FS |
| CRB310       | China                    | B                | 6          |                       | <i>P. sativum</i> | <i>sativum</i>     | China             | gty |    |   |    |
| ATC 6961     | XJ1                      | B                | 6          |                       | <i>P. sativum</i> | <i>sativum</i>     | China             | gty | PL | M | FS |
| ATC 6972     | QH2                      | B                | 6          |                       | <i>P. sativum</i> | <i>sativum</i>     | China             | gty | pl | m | FS |
| ATC 7061     | SX3                      | B                | 6          |                       | <i>P. sativum</i> | <i>sativum</i>     | China             | gty | PL | M | FS |
| ATC 7102     | IM2                      | B                | 6          |                       | <i>P. sativum</i> | <i>sativum</i>     | China             | gty | PL | M | FS |
| ATC 7108     | IM3                      | B                | 6          |                       | <i>P. sativum</i> | <i>sativum</i>     | China             | gty | PL | M | FS |
| ATC 7125     | SX4                      | B                | 6          |                       | <i>P. sativum</i> | <i>sativum</i>     | China             | gty | PL | M | FS |
| ATC 7142     | AH2                      | B                | 6          |                       | <i>P. sativum</i> | <i>sativum</i>     | China             | gty | pl | M | FS |
| JI 252       | ATC 864                  | B                | 6          | 3.4                   | <i>P. sativum</i> | <i>sativum</i>     | Ethiopia          | gty | PL | M | FS |
| ATC 6939     | IM1                      | B                | 6          |                       | <i>P. sativum</i> | <i>sativum</i>     | China             | gty | PL | m | FS |
| ATC 6931     | HN1                      | B                | 7          |                       | <i>P. sativum</i> | <i>sativum</i>     | China             | gty | PL | M | FS |
| JI.261       |                          | —                | 8          | 3.1                   | <i>P. sativum</i> | <i>elatius</i>     | Turkey            | GTY | PL | M | FS |
| JI 64        | ATC 858                  | C                | 9          | 3.2                   | <i>P. sativum</i> | <i>elatius</i>     | Israel            | GTY | pl | m | FS |
| JI 85        | ATC 3470                 | C                | 10         | 3.5                   | <i>P. sativum</i> | <i>sativum</i>     | Afghanistan       | gty | pl | M | FS |
| JI 94        | ATC 1389                 | C                | 10         | 3.3                   | <i>P. sativum</i> | <i>sativum</i>     | Afghanistan       | gty | pl | M | FS |
| JI 96        | ATC 859                  | C                | 10         | 3.3                   | <i>P. sativum</i> | <i>sativum</i>     | Afghanistan       | gty | pl | M | FS |
| JI 103       | ATC 2711                 | C                | 10         | 3.5                   | <i>P. sativum</i> | <i>sativum</i>     | Afghanistan       | gty | PL | M | FS |
| JI 108       | ATC 1390                 | C                | 10         | 3.U                   | <i>P. sativum</i> | <i>sativum</i>     | Afghanistan       | gty | PL | M | FS |
| JI 715       | ATC 1484                 | C                | 10         | 3.5                   | <i>P. sativum</i> | <i>sativum</i>     | Russia            | gty | PL | M | FS |
| JI 1249      | ATC 1526                 | C                | 10         | 3.3                   | <i>P. sativum</i> | <i>sativum</i>     | India             | gty | PL | M | FS |
| JI 1543      | ATC 2706                 | C                | 10         | 3.5                   | <i>P. sativum</i> | <i>sativum</i>     | Mongolia          | gty | pl | M | FS |
| JI 2019      | ATC 1654                 | C                | 10         | 3.U                   | <i>P. sativum</i> | <i>sativum</i>     | India             | gty | PL | M | FS |
| CRB014       | JI 15                    | C                | 10         |                       | <i>P. sativum</i> | <i>sativum</i>     | Sweden            | gty |    |   |    |
| CRB151       | PI212112                 | C                | 10         |                       | <i>P. sativum</i> | <i>sativum</i>     | Afghanistan       | gty |    |   |    |
| CRB152       | Moshong                  | C                | 10         |                       | <i>P. sativum</i> | <i>sativum</i>     | Afghanistan       | gty |    |   |    |
| ATC 6964     | QH1                      | C                | 10         |                       | <i>P. sativum</i> | <i>sativum</i>     | China             | gty | PL | M | FS |
| ATC 7017     | GX1                      | C                | 10         |                       | <i>P. sativum</i> | <i>sativum</i>     | China             | gty | pl | M | FS |
| ATC 7033     | YN2                      | C                | 10         |                       | <i>P. sativum</i> | <i>sativum</i>     | China             | gty | PL | M | FS |
| ATC 7087     | HN2                      | C                | 10         |                       | <i>P. sativum</i> | <i>sativum</i>     | China             | gty | pl | m | FS |
| ATC 7178     | GX3                      | C                | 10         |                       | <i>P. sativum</i> | <i>sativum</i>     | China             | gty | PL | M | fs |
| ATC 7203     | SC3                      | C                | 10         |                       | <i>P. sativum</i> | <i>sativum</i>     | China             | gty | pl | M | FS |
| ATC 7218     | HB1                      | C                | 10         |                       | <i>P. sativum</i> | <i>sativum</i>     | China             | gty | PL | m | FS |
| ATC 6958     | GD1                      | C                | 10         |                       | <i>P. sativum</i> | <i>sativum</i>     | China             | gty | pl | M | FS |
| ATC 6974     | QH3                      | C                | 10         |                       | <i>P. sativum</i> | <i>sativum</i>     | China             | gty | pl | M | FS |
| ATC 7025     | SC1                      | C                | 10         |                       | <i>P. sativum</i> | <i>sativum</i>     | China             | gty | PL | m | FS |
| ATC 7008     | TB1                      | C                | 11         |                       | <i>P. sativum</i> | <i>sativum</i>     | China             | gty | PL | M | FS |
| CRB191       | POL 6806                 | —                | 12         |                       | <i>P. sativum</i> |                    | Poland            |     |    |   |    |
| JI 2         | ATC 1067                 | D                | 13         | 3.1                   | <i>P. sativum</i> | <i>abyssinicum</i> | Ethiopia          | gty | PL | m | fs |

**Table S1. Cont.**

| Accession ID | Alternative accession ID | Haplo-type group | Haplo-type | Jing et al. (1) group | Species           | Variety            | Country of origin | GTY | PL | M | FS |
|--------------|--------------------------|------------------|------------|-----------------------|-------------------|--------------------|-------------------|-----|----|---|----|
| Jl 224       | ATC 105                  | D                | 13         |                       | <i>P. sativum</i> | <i>abyssinicum</i> | Israel            | gty | PL | m | fs |
| Jl 225       | ATC 1429                 | D                | 13         | 3.1                   | <i>P. sativum</i> | <i>abyssinicum</i> | Ethiopia          | gty | PL | m | fs |
| Jl 691       | ATC 109                  | D                | 13         | 3.1                   | <i>P. sativum</i> | <i>abyssinicum</i> | Ethiopia          | gty | PL | m | fs |
| Jl 2385      | ATC 1735                 | D                | 13         | 3.1                   | <i>P. sativum</i> | <i>abyssinicum</i> | Yemen             | gty | PL | m | fs |
| CRB203       | Braun-Yemen              | D                | 13         |                       | <i>P. sativum</i> | <i>abyssinicum</i> | Yemen             |     |    |   |    |
| Jl 1794      |                          | —                | 14         |                       | <i>P. sativum</i> | <i>humile</i>      | Israel            | GTY | PL | M | FS |
| Jl 1796      | ATC 1633                 | —                | 15         | 3.6                   | <i>P. fulvum</i>  |                    | Israel            | GTY |    |   |    |

Accessions were obtained from the John Innes Centre (JI) collection (United Kingdom), The CRB collection (France), and the Chinese National Core Collection. Accessions obtained via the Australian Temperate Field Crops Collection (ATFCC) are indicated by an ATC accession ID. Haplotype and haplotype group designations correspond to those given in Fig. 4. Also indicated are the grouping in the Structure analysis of Jing et al. (1), and the genotype at four classic seed markers FS (purple testa patterning), GTY (rough thick testa), M (brown testa marbling), and PL (hilum color).

**Table S2. Details of QTL for node of flower initiation in NGB5839 × JI1794 F<sub>2</sub>**

| Name | LG  | Analysis      | Position (cM) | Peak marker | LOD  | % explained | Genotype means |      |         |
|------|-----|---------------|---------------|-------------|------|-------------|----------------|------|---------|
|      |     |               |               |             |      |             | Jl1794         | het  | NGB5839 |
| QTL3 | III | 1             | 28.1          | MAX1        | 9.3  | 17.6        | 40.9           | 36.2 | 21.8    |
|      |     | 2 (with ELF3) | 28.4          | ELF3        | 10.4 | 18.3        | 41.1           | 36.5 | 21.1    |
| QTL6 | VI  | 1             | 67.2          | RNAhel      | 21.4 | 54.6        | 47.1           | 22.7 | 15.6    |
|      |     | 2 (with ELF3) | 67.2          | RNAhel      | 22.4 | 55.6        | 46.9           | 22.0 | 15.3    |

QTL on linkage groups III and VI were detected by MQM analysis in MapQTL 6 (Kyzama).

**Table S3. Single marker effects on node of flower initiation in NGB5839 × JI1794 F<sub>2</sub>**

| Marker     | Linkage group | r <sup>2</sup> | Probability | Probability (Bonferroni) | Genotype means ± SE |            |            |
|------------|---------------|----------------|-------------|--------------------------|---------------------|------------|------------|
|            |               |                |             |                          | Jl1794              | het        | NGB5839    |
| LF/TFL1c   | II            | 2.7            | 0.30        | 1                        | 25.6 ± 3.9          | 30.3 ± 2.3 | 34.0 ± 3.5 |
| GIGAS/FTa1 | V             | 1.0            | 0.64        | 1                        | 30.1 ± 3.2          | 29.3 ± 2.4 | 33.4 ± 4.0 |
| PRR37      | VII           | 3.7            | 0.19        | 1                        | 30.8 ± 3.9          | 27.7 ± 2.0 | 35.0 ± 3.8 |
| LE         | III           | 0.9            | 0.68        | 1                        | 33.1 ± 2.9          | 29.4 ± 2.7 | 30.7 ± 3.5 |

Contributions of individual loci were assessed using generalized linear model in SAS. PRR37 is a marker closely linked to the SN locus.

**Table S4. Medicago orthologs of functional candidates for pea HR locus**

| Gene                                 | Medicago BAC | MtGenome 3.5  | Inferred location in pea (7) |
|--------------------------------------|--------------|---------------|------------------------------|
| FRIGIDA-LIKE b (FRLb)                | AC137079     | Medtr5g094400 | LG I, ~11cM                  |
| EARLY FLOWERING 3 (ELF3)             | CU468275     | Medtr3g103970 | LG III, ~40cM                |
| FRIGIDA (FRI)                        | CT010504     | Medtr3g098560 | LG III, ~65cM                |
| FRIGIDA-LIKE a (FRLa)                | AC121232     | Medtr3g056070 | LG III, ~185cM               |
| FAR-RED ELONGATED HYPOCOTYL 3 (FHY3) | CT030192     | Medtr3g010690 | LG III, ~205cM               |
| LUX ARRHYTHMO (LUX)                  | AC202498     | Medtr4g064730 | LG VI, ~125cM                |

**Table S5. Marker details**

| Name            | LG  | Accession number              | Source                     | Type   | Population        | Primers                                                     | Tm (°C) | Enzyme/Product Tm (°C) |
|-----------------|-----|-------------------------------|----------------------------|--------|-------------------|-------------------------------------------------------------|---------|------------------------|
| <i>LF</i>       | II  | AY343326                      | {Foucher, 2003 #562} (1)   | CAPS   | NGB5839 × JI1794  | F:CTGGCCCAAGTGATCCTTAC<br>R:AAGCATCAAATGATCAATCAAA          | 58      | BsrI                   |
| <i>SBE2</i>     | III | X80010                        | {Aubert, 2006 #6277} (2)   | CAPS   | NGB5839 × JI1794  | F:CCCCGATGCTGATGGAAATCC<br>R:CTTTGGCCACATCAAAGCCG           | 60      | HpaI                   |
| <i>RMS1</i>     | III | AY557341                      | {Sorefan, 2003 #6512} (3)  | CAPS   | NGB5839 × JI1794  | F:AGGGCTGAACCAACTCCTTT<br>R:GCCCTAGCAACCTCTTCAA             | 60      | TaqI                   |
| <i>CRY-DASH</i> | III | JI960646                      | Present study              | CAPS   | NGB5839 × JI1794  | F:CTGGGTTTTGTTGCGAGTTGA<br>R:CCACGATTTGACATGAAACCT          | 60      | MseI                   |
| <i>COLc</i>     | III | JN982281                      | Present study              | HRM    | NGB5839 × JI1794  | F:CACATACGGAGATAGAGACACC<br>R:TTCTCCATCGGGAACAACTC          | 55      | ~79.5                  |
| <i>MAX1</i>     | III | A de Saint-Germain pers comm. | Present study              | CAPS   | NGB5839 × JI1794  | F:GCAGATGCAGAAGTGTGTAAG<br>R:CGCAGCAACCAAATAGACTA           | 57      | AccI                   |
| <i>ELF3</i>     | III | JN983407                      | Present study              | CAPS   | NGB5839 × JI1794  | F:GCAGTAATAGGCCAAAAACATTTCCGG<br>R:AACTCAAACACTTGGACTGC     | 62      | TaqI                   |
| <i>ELF3</i>     | III | JN983406                      | Present study              | CAPS   | NGB5839 × WL1771  | F:AAATTGTTATCATTCCGAACACA<br>R:GGAATACTAAATTGCTCATACAAAGCC  | 60      | HaeIII/Spel            |
| <i>LcELF3</i>   | —   | JX946295                      | Present study              | CAPS   | ILL6005 × ILL5588 | F:GCAGTAATAGGCCAAAAACATTTCTGG<br>R:CGATCCGGCAATCAGTTGTT     | 55      | DraI                   |
| <i>M</i>        | III | —                             | {Bordat, 2011 #6441} (4)   | Morph. | NGB5839 × JI1794  |                                                             |         |                        |
| <i>COQ1</i>     | III | JI914833                      | Present study              | Size   | NGB5839 × JI1794  | F:ATTTAGTCCTGGCCCGTTC<br>R:TCCATATATCAAGCGGCAAC             | 55      | —                      |
| <i>TIC22</i>    | III | AF095284                      | Present study              | HRM    | NGB5839 × JI1794  | F:TCTGGCAGCTTACAATCATC<br>R:TGTTGAAGGTTGAAGGTATTGC          | 55      | ~76                    |
| <i>HYL</i>      | III | JX946299                      | Present study              | CAPS   | NGB5839 × JI1794  | F:AAAGCAGCAGCAGCAGTTCAG<br>R:TCTTGACACAATCCAGTTTCA          | 55      | HaeIII                 |
| <i>NIP</i>      | III | U15036                        | {Aubert, 2006 #6277} (2)   | HRM    | NGB5839 × JI1794  | F:GGATTCTACTAACCACATGGACC<br>R:CAATACTTTTTAACTAACACCAAAAA   | 53      | ~74                    |
| <i>FRI</i>      | III | JX946297                      | Present study              | Size   | NGB5839 × JI1794  | F:TGCAACCATTTGTTTTAAGGTC<br>R:AGGGAAATTTGGGTGGAAT           | 60      | —                      |
| <i>UNI</i>      | III | AF010190                      | {Hofer, 1997 #4175} (5)    | CAPS   | NGB5839 × JI1794  | F:CATCAGAGCTGAAAGAAGG<br>R:GCTTCCTTTTACAGTTGC               | 55      | RsaI, MboI             |
| <i>AAP2</i>     | III | G Aubert pers comm.           | {Aubert, 2006 #6277} (2)   | HRM    | NGB5839 × JI1794  | F:TTTACAATTTTTCTTTAGCTGCAT<br>R:TGGATGTAGTCATTTTATTAACACAGA | 53      | ~69                    |
| <i>RKP</i>      | III | JN982282                      | Present study              | HRM    | NGB5839 × JI1794  | F:CTTTGTCGGAGTCAATCAGC<br>R:CCCATCAATCATGACAATGC            | 55      | ~74                    |
| <i>PRR59</i>    | III | FJ609179                      | Present study              | CAPS   | NGB5839 × JI1794  | F:ATGCATGTTGAGAGGTGCAG<br>R:AGCTTCCATGTTTGGCTTTG            | 58      | RsaI                   |
| <i>OMT1</i>     | III | JI897876                      | Present study              | Size   | NGB5839 × JI1794  | F:CCTCATGTGTCATTGAAGACGC<br>R:TTCCCACCTGGATTATGAGC          | 50      | —                      |
| <i>SEP3</i>     | III | AJ223318                      | Present study              | CAPS   | NGB5839 × JI1794  | F:GGAGAAGATCTTGGCCCTCT<br>R:CATCATCATGGTAACCATCC            | 58      | PciI                   |
| <i>COLe</i>     | III | JX946296                      | Present study              | CAPS   | NGB5839 × JI1794  | F:AGAGCAAAAGCCATGTCTAC<br>R:CCAAGGACGGAGAATCAGC             | 55      | HpyCH4IV               |
| <i>LONG1</i>    | III | FJ374121                      | {Weller, 2009 #6333} (6)   | HRM    | NGB5839 × JI1794  | F:GCTGACAAAGAAAGCAAACG<br>R:AGCTGAAACTCGGTTCTCA             | 52      | ~77                    |
| <i>ELF4</i>     | III | AY830926                      | {Liew, 2009 #6376} (7)     | HRM    | NGB5839 × JI1794  | F:GCATGGCAAATAATCAGAGG<br>R:TCTTCCATGATTTACAACTCC           | 55      | ~76                    |
| <i>LE</i>       | III | AF001219                      | {Martin, 1997 #4223} (8)   | CAPS   | NGB5839 × JI1794  | F:TCTGGCCTCAAGATTATACC<br>R:GGTTCACTAAAACCTGATGG            | 60      | BanI                   |
| <i>FTa1</i>     | V   | HQ538822                      | {Hecht, 2011 #6456} (9)    | CAPS   | NGB5839 × JI1794  | F:GCAACATCCAAATAAAATGAAGG<br>R:TACACGACCAACAGCGAGAG         | 60      | BglI                   |
| <i>FTc</i>      | V   | HQ538826                      | {Hecht, 2011 #6456} (9)    | CAPS   | NGB5839 × JI1794  | F:CCTTGGCAGGGATTATCATCG<br>R:GCAGGTGCTGGTCTCTTTCC           | 62      | HpyCH4IV               |
| <i>SEP1-2</i>   | V   | AY884290                      | {Hecht, 2005 #327} (10)    | CAPS   | NGB5839 × JI1794  | F:CATCTCTGAAGCATGTTAGG<br>R:TTGTTGAGCTTGACTTGTGG            | 60      | BbvI                   |
| <i>FTb1</i>     | V   | HQ538824                      | {Hecht, 2011 #6456} (9)    |        | NGB5839 × JI1794  | F:CTCTATTTCAACTGTCAGCGAC<br>R:TGCACAATTGTTAGCTTGTTCG        | 62      | BccI                   |
| <i>SLN</i>      | VI  | AF101383                      | {Deulvot, 2010 #6437} (11) | CAPS   | NGB5839 × JI1794  | F:CACAACCAATCAAGAACACAATTTTC<br>R:CCCTTCTGCCATCAAATCAAG     | 60      | DdeI, TaqI             |



Table S5. Cont.

| Name               | LG  | Accession number                   | Source                      | Type  | Population       | Primers                                                    | Tm (°C) | Enzyme/Product Tm (°C) |
|--------------------|-----|------------------------------------|-----------------------------|-------|------------------|------------------------------------------------------------|---------|------------------------|
| <i>PIN1</i>        | VI  | AY222857                           | {Deulvot, 2010 #6437} (11)  | CAPS  | NGB5839 × JI1794 | F:GACGTGACTCTATCTGACACG<br>R:AACATAAAGTGGCACCATTGC         | 60      | RsaI                   |
| <i>UNK4</i>        | VI  | JN982285                           | Present study               | CAPS  | NGB5839 × JI1794 | F:GCCCTCTTCTGGGAAAGC<br>R:TAAACCCGCAAGATGCTCA              | 55      | EcoRV                  |
| <i>AGO1</i>        | VI  | EF108450                           | {Deulvot, 2010 #6437} (11)  | HRM   | NGB5839 × JI1794 | F:TTACTCCCATGTCATCCTTGG<br>R:CAAGCATTAAAGAACCAGCAAG        | 55      | ~72 °C                 |
| <i>WRI-33</i>      | VI  | JN982283                           | Present study               | CAPS  | NGB5839 × JI1794 | F:TGACCAAAGAGGAGTACTTGG<br>R:AGCACGTGCAGCTTCTT             | 55      | BbvI                   |
| <i>PCFS4</i>       | VI  | JN982284                           | Present study               | CAPS  | NGB5839 × JI1794 | F:GTACGGTCCACCACTTTTGC<br>R:GGATCAACTCAATGCCAAC            | 52      | BtgI                   |
| <i>RUG5/ Gbts2</i> | VI  | X88790                             | {Aubert, 2006 #6277} (2)    | CAPS  | NGB5839 v JI1794 | F:GCCGGTGTATCTGAAAGCAT<br>R:ACACCGTTACAATTCCTCCG           | 60      | AccI                   |
| <i>MLO1</i>        | VI  | FJ463618                           | {Humphry, 2011 #6457} (12)  | HRM   | NGB5839 × JI1794 | F:TGGCTCTTAGGCATGGATTT<br>R:TTGTGCATCATGTCCTGGAG           | 55      | ~74 °C                 |
| <i>RNAhel</i>      | VI  | PSCC24A19u (IPK Crop EST database) | {Aubert, 2006 #6277} (2)    | CAPS  | NGB5839 × JI1794 | F:GGGTTTGGTAGGTTGGTAGAGG<br>R:GCTATCAAAATTGTAGTGGGTGGG     | 60      | MseI                   |
| <i>CABB</i>        | VI  | CD859031                           | {Deulvot, 2010 #6437} (11)  | HRM   | NGB5839 × JI1794 | F:AGGATCTTCTTGCTGATGG<br>R:CTTGCTTAGACCAAAAAGGATCA         | 55      | ~81 °C                 |
| <i>GA20ox1</i>     | VI  | AF138704/U70471                    | {Aubert, 2006 #6277} (2)    | CAPS  | NGB5839 × JI1794 | F:CATTCCATTAGGCCAAATTTCAAT<br>R:CTGCCCTATGTAACAACCTTGTATCT | 60      | SspI                   |
| <i>GRITTY</i>      | VI  | —                                  | {Bordat, 2011 #6441} (4)    | Morph | NGB5839 × JI1794 | —                                                          | —       | —                      |
| <i>FVE</i>         | VI  | AY830931                           | {Hecht, 2005 #327} (10)     | CAPS  | NGB5839 × JI1794 | F:GCAAAATTCTAAGATAGTGG<br>R:GTTGGGCACATCGCAAGAGC           | 58      | BsaI                   |
| <i>LKP1</i>        | VI  | JX946298                           | Present study               | CAPS  | NGB5839 × JI1794 | F:AGAATGGGCGACGAAGGTAT<br>R:AAACCGCACCGTCTCTAC             | 62      | RsaI                   |
| <i>PHYB</i>        | VI  | AF069305                           | {Weller, 2001 #5727} (13)   | CAPS  | NGB5839 × JI1794 | F:AATCCCTTGAGTGGCATACG<br>R:CAGCATGCAGAAGAGTGAGC           | 60      | RsaI, BslI             |
| <i>NA</i>          | VI  | AF537321                           | {Davidson, 2003 #6458} (14) | Size  | NGB5839 × JI1794 | F:ATTGGTGGTTTTTGGAGAGG<br>R:CCATGTAAGCACTTCCAAC            | 60      | —                      |
| <i>PRR37</i>       | VII | FJ609177                           | Present study               | CAPS  | NGB5839 × JI1794 | F:TGGCAACATGTTGGAGAAG<br>R:ACACTCAAGCCTCTGCTCC             | 60      | XmnI                   |

- Foucher F, et al. (2003) *DETERMINATE* and *LATE FLOWERING* are two *TERMINAL FLOWER1/CENTRORADIALIS* homologs that control two distinct phases of flowering initiation and development in pea. *Plant Cell* 15(11):2742–2754.
- Aubert G, et al. (2006) Functional mapping in pea, as an aid to the candidate gene selection and for investigating synteny with the model legume *Medicago truncatula*. *Theor Appl Genet* 112(6):1024–1041.
- Sorefan K, et al. (2003) *MAX4* and *RMS1* are orthologous dioxygenase-like genes that regulate shoot branching in Arabidopsis and pea. *Genes Dev* 17(12):1469–1474.
- Bordat A, et al. (2011) Translational genomics in legumes allowed placing in silico 5460 unigenes on the pea functional map and identified candidate genes in *Pisum sativum* L. *G3 (Bethesda)* 1(4):93–103.
- Hofer J, et al. (1997) *UNIFOLIATA* regulates leaf and flower morphogenesis in pea. *Current Biology* 7(8):581–587.
- Weller JL, et al. (2009) Light regulation of gibberellin biosynthesis in pea is mediated through the COP1/HY5 pathway. *Plant Cell* 21(3):800–813.
- Liew LC, et al. (2009) *DIE NEUTRALIS* and *LATE BLOOMER 1* contribute to regulation of the pea circadian clock. *Plant Cell* 21(10):3198–3211.
- Martin DN, et al. (1997) Mendel's dwarfing gene: cDNAs from the *Le* alleles and function of the expressed proteins. *Proc Natl Acad Sci USA* 94(16):8907–8911.
- Hecht V, et al. (2011) The pea *GIGAS* gene is a *FLOWERING LOCUS T* homolog necessary for graft-transmissible specification of flowering but not for responsiveness to photoperiod. *Plant Cell* 23(1):147–161.
- Hecht V, et al. (2005) Conservation of *Arabidopsis* flowering genes in model legumes. *Plant Physiol* 137(4):1420–1434.
- Deulvot C, et al. (2010) Highly-multiplexed SNP genotyping for genetic mapping and germplasm diversity studies in pea. *BMC Genomics* 11:468.
- Humphry M, et al. (2011) Durable broad-spectrum powdery mildew resistance in pea *er1* plants is conferred by natural loss-of-function mutations in *PsmLO1*. *Mol Plant Pathol* 12(9):866–878.
- Weller JL, et al. (2001) Interaction of phytochromes A and B in the control of de-etiolation and flowering in pea. *Plant Journal* 26(3):283–294.
- Davidson SE, et al. (2003) The pea gene *NA* encodes ent-kaurenoic acid oxidase. *Plant Physiol* 131(1):335–344.

**Table S6. *ELF3* Primer sequences**

| Name       | Sequence                             | Use                |
|------------|--------------------------------------|--------------------|
| PsELF3-FF  | 5'-GTTTAGAGTTTAGGATAGAAAAGGGGTAGG-3' | PCR and sequencing |
| PsELF3-11R | 5'-GCAATTCCTTTCTGGCTTCC-3'           | PCR and sequencing |
| PsELF3-4R  | 5'-GTTTCCAGCCTGACGAAT-3'             | Sequencing         |
| PsELF3-5F  | 5'-ACCAGTCCAACCCAGGCTAT-3'           | PCR and sequencing |
| PsELF3-RR  | 5'-GATCCTCCATGTCAATATACACCACTAC-3'   | PCR and sequencing |
| PsELF3-7F  | 5'-TGTTTGCAGTCCAAGTGTTG-3'           | Sequencing         |
| PsELF3-7R  | 5'-CGATCCGGCAATTAGTTGTT-3'           | Sequencing         |
| LcELF3-F1  | 5'-TGGACATGGACAAAGTGACG-3'           | PCR and sequencing |
| LcELF3-R1  | 5'-CCGTTACATGATGGCACACC-3'           | PCR and sequencing |
